# Supplementary material for: A highly stable MOF with F and N accessible sites for efficient capture and separation of acetylene from ternary mixtures
Source: Royal Society of Chemistry journal article supplement (doi:10.1039/d1ta05720k), 2021-01-01
Supplement: d1ta05720k1.pdf [file d1ta05720k1.pdf]

## ***Supporting Information***

### **A highly stable MOF with F and N accessible sites for efficient capture and separation of acetylene from ternary mixture**

Gang-Ding Wang,<sup>a</sup> Hai-Hua Wang,<sup>b</sup> Wen-Juan Shi,<sup>a</sup> Lei Hou,<sup>\*,a</sup> Yao-Yu Wang<sup>a</sup> and Zhonghua Zhu<sup>c</sup>

*<sup>a</sup>Key Laboratory of Synthetic and Natural Functional Molecule Chemistry of the Ministry of Education, National Demonstration Center for Experimental Chemistry Education (Northwest University), College of Chemistry & Materials Science, Northwest University, Xi'an, 710069, P. R. China.*

*<sup>b</sup>College of Food Science and Engineering, Northwest A&F University, Yangling, Shaanxi 712100, China.*

*<sup>c</sup>School of Chemical Engineering, The University of Queensland Brisbane 4072, Australia.*

*\*To whom correspondence should be addressed. E-mail: swjuan2000@126.com (Wen-Juan Shi), lhou2009@nwu.edu.cn (Lei Hou).*

| Molecular structure           |                                                                                   |                                                                                   |                                                                                    |                                                                                     |                                                     |                   |
|-------------------------------|-----------------------------------------------------------------------------------|-----------------------------------------------------------------------------------|------------------------------------------------------------------------------------|-------------------------------------------------------------------------------------|-----------------------------------------------------|-------------------|
|                               |  |  |  |  |                                                     |                   |
| Molecular formula             | Molecular dimension (Å)                                                           |                                                                                   |                                                                                    | Kinetic diameter (Å)                                                                | Polarizability $\times 10^{-25}$ (cm <sup>3</sup> ) | Boiling point (K) |
|                               | X                                                                                 | Y                                                                                 | Z                                                                                  |                                                                                     |                                                     |                   |
| C <sub>2</sub> H <sub>2</sub> | 3.32                                                                              | 3.34                                                                              | 5.70                                                                               | 3.33                                                                                | 33.3-39.3                                           | 188.4             |
| C <sub>2</sub> H <sub>4</sub> | 3.28                                                                              | 4.18                                                                              | 4.84                                                                               | 4.16                                                                                | 42.5                                                | 169.4             |
| C <sub>2</sub> H <sub>6</sub> | 3.81                                                                              | 4.08                                                                              | 4.82                                                                               | 4.44                                                                                | 44.3-44.7                                           | 184.6             |
| CO <sub>2</sub>               | 3.2                                                                               | 3.3                                                                               | 5.4                                                                                | 3.33                                                                                | 29.11                                               | 194.7             |

**Scheme S1.** Structures and physical properties of C<sub>2</sub>H<sub>2</sub>, C<sub>2</sub>H<sub>4</sub>, C<sub>2</sub>H<sub>6</sub> and CO<sub>2</sub>.

### X-ray crystallography

A Bruker Smart Apex II CCD detector was used to collect the single crystal data at 296(2) K using Mo K $\alpha$  radiation ( $\lambda = 0.71073$  Å). The structure was solved by direct methods and refined by full-matrix least-squares refinement based on F<sup>2</sup> with the SHELXTL program. The non-hydrogen atoms were refined anisotropically with the hydrogen atoms added at their geometrically ideal positions and refined isotropically. As the disordered solvent DMF molecules in the structure cannot be located, the SQUEEZE routine of Platon program was applied in refining. The formula of complex was got by the single crystal analysis together with elemental microanalyses and TGA data. Relevant crystallographic results are listed in Table S1. Selected bond lengths and angles are provided in Table S2.

### N<sub>2</sub> sorption isotherm

Before gas sorption experiments, All the as-synthesized samples were immersed in CH<sub>3</sub>OH for 72 hours, during which the solvent was decanted and freshly replenished four times a day. All the samples were activated under vacuum at 463 K for 6 hours. In addition, after removal of guest molecules leads to a color change from light blue to dark green for **1a** (Figure S7). Gas sorption measurements were then conducted using a Micrometrics ASAP 2020M gas adsorption analyzer.

## Fitting adsorption heat of pure component isotherms

$$\ln P = \ln N + 1/T \sum_{i=0}^m a_i N^i + \sum_{i=0}^n b_i N^i \quad Q_{st} = -R \sum_{i=0}^m a_i N^i$$

The above virial expression was used to fit the combined isotherm data for **1a** at 273.15 and 298 K, where P is the pressure, N is the adsorbed amount, T is the temperature,  $a_i$  and  $b_i$  are virial coefficients, and m and N are the number of coefficients used to describe the isotherms.  $Q_{st}$  is the coverage-dependent enthalpy of adsorption and R is the universal gas constant.

## Gas selectivity prediction via IAST

The experimental isotherm data for pure C<sub>2</sub>, CH<sub>4</sub> were fitted using a dual Langmuir-Freundlich (L-F) model:

$$q = \frac{a_1 * b_1 * P^{c1}}{1 + b_1 * P^{c1}} + \frac{a_2 * b_2 * P^{c2}}{1 + b_2 * P^{c2}}$$

Where q and p are adsorbed amounts and the pressure of component i, respectively.

The adsorption selectivities for binary mixtures of C<sub>2</sub>/CH<sub>4</sub>, defined by

$$S_{i/j} = \frac{x_i * y_j}{x_j * y_i}$$

Were respectively calculated using the Ideal Adsorption Solution Theory (IAST). Where  $x_i$  is the mole fraction of component i in the adsorbed phase and  $y_i$  is the mole fraction of component i in the bulk.

## Breakthrough experiments

The breakthrough experiment was performed on the Quantachrome dynaSorb BT equipments at 298 K and 1 bar with an equal volume of mixed gas (gas A: gas B: Ar = 5% : 5% : 90% or gas A: gas B: gas C: Ar = 5%: 5%: 5%: 85%, Ar as the carrier gas, flow rate = 8 mL/min). The activated **1a** (0.7 g) was filled into a packed column of  $\phi$  4.2×80 mm, and then the packed column was washed with Ar at a rate of 8 mL min<sup>-1</sup> at 70 °C for 60 minutes to further activate the samples. Between two breakthrough experiments, the adsorbent was regenerated by Ar flow of 8 mL min<sup>-1</sup> for 35 min at 80 °C to guarantee a complete removal of the adsorbed gases.

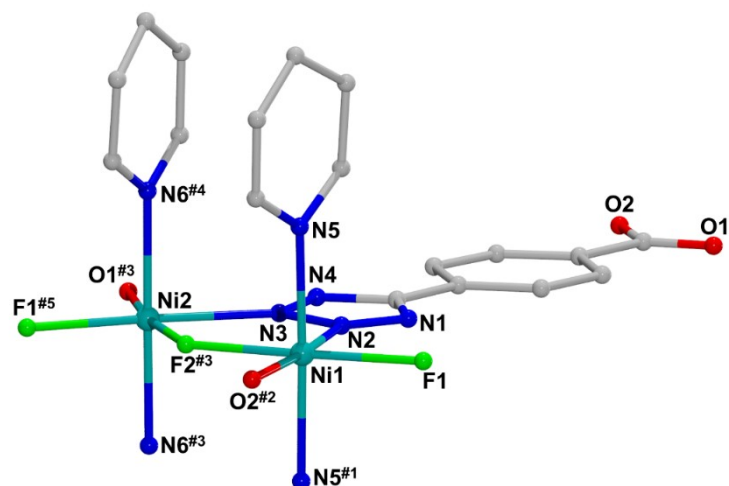

**Fig. S1** Coordination environment of  $\text{Ni}^{2+}$  ion in **1**. Symmetry codes: #1  $1-x, y, z$ ; #2  $x, -1+y, z$ ; #3  $1-x, 1-y, -0.5+z$ ; #4  $x, 1-y, -0.5+z$ ; #5  $1-x, -y, -0.5+z$ .

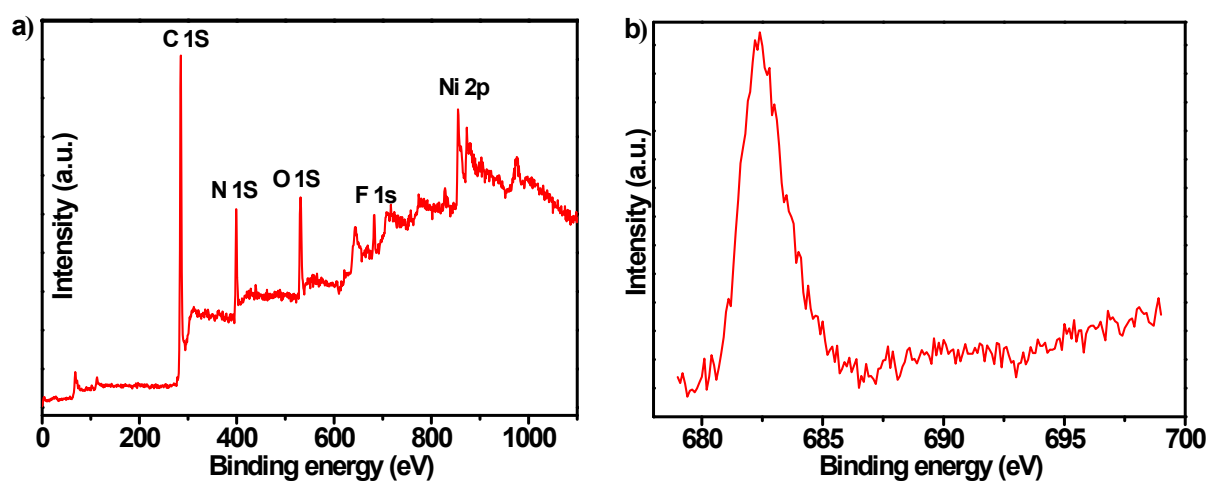

**Fig. S2** XPS patterns of **1**: a) survey, and b) F 1s.

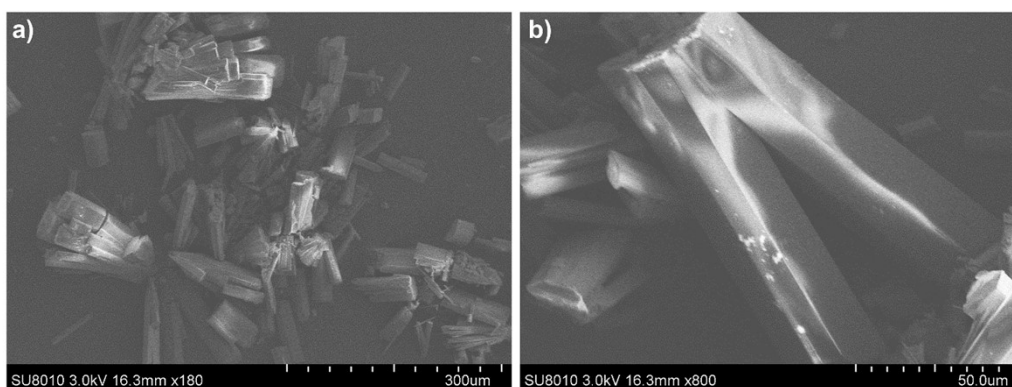

**Fig. S3** SEM images of **1**.

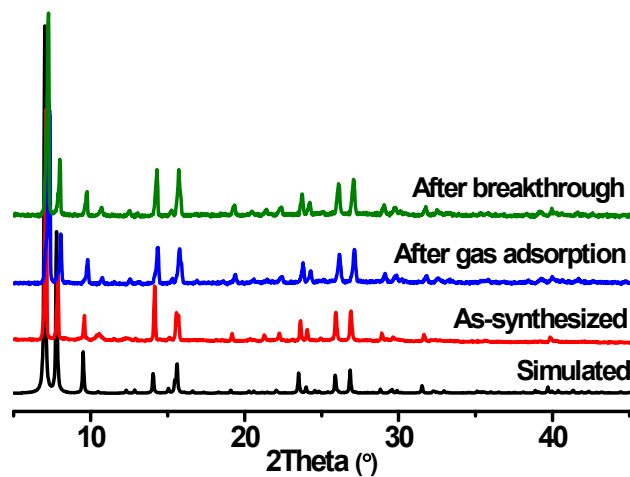

**Fig. S4** PXRD of **1** from simulated by single-crystal structure, as-synthesized, desolvated **1a** and samples immersed in the different aqueous solutions.

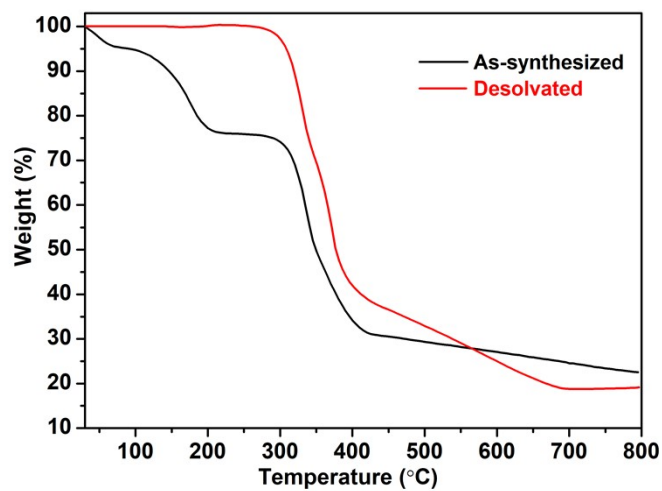

**Fig. S5** TGA curves of as-synthesized and desolvated samples of **1**.

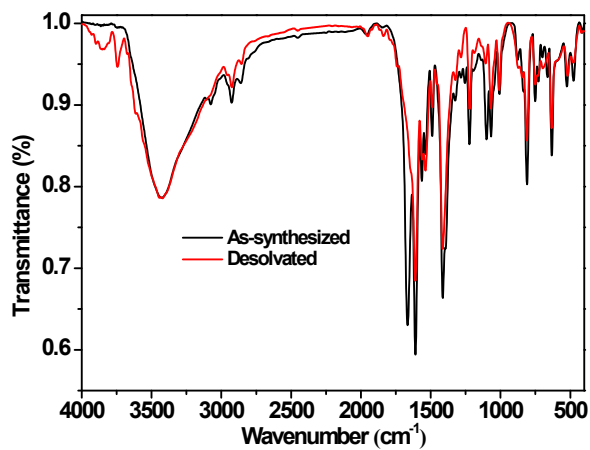

**Fig. S6** FTIR spectra of the as-synthesized and desolvated of **1**.

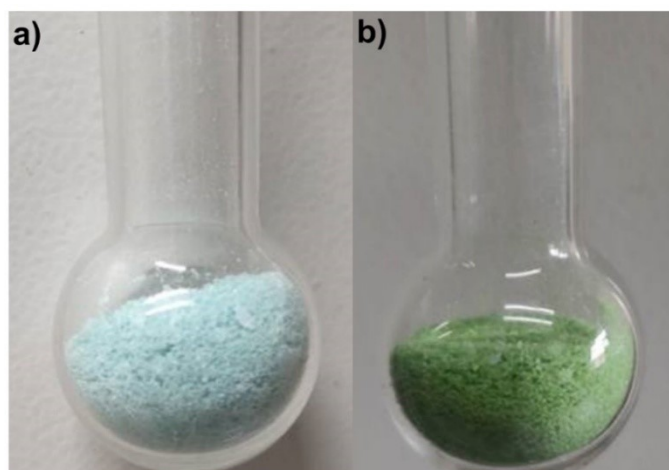

**Fig. S7** The color of samples changed a) before and b) after degas.

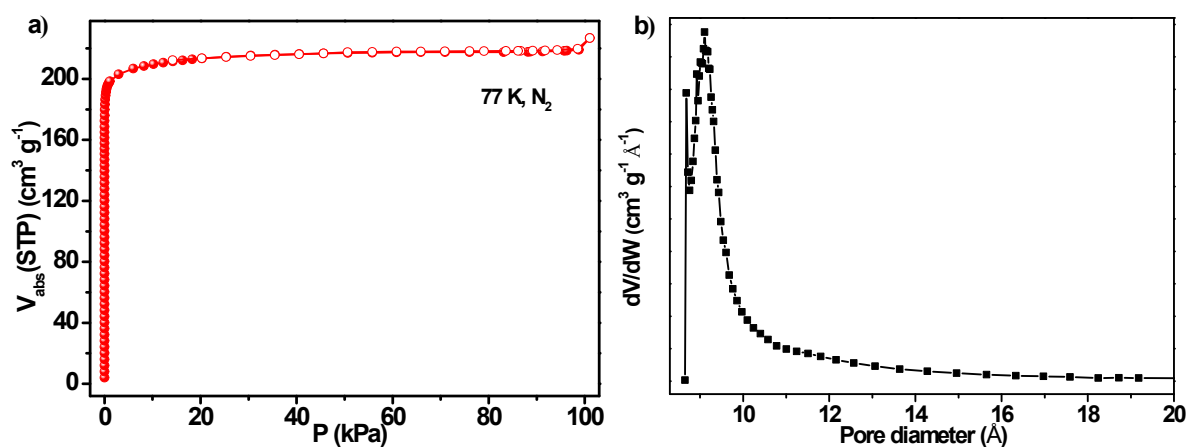

**Fig. S8** a) Sorption isotherms of  $N_2$  at 77 K for **1a**, and b) porous distribution plots obtained by the adsorption isotherm of  $N_2$  at 77 K using the Horvath-Kawazoe model.

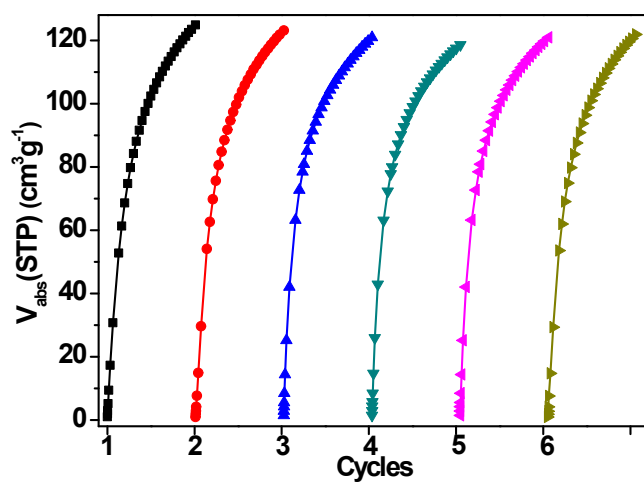

**Fig. S9.**  $C_2H_2$  uptake of **1a** for 6 cycles at 298 K.

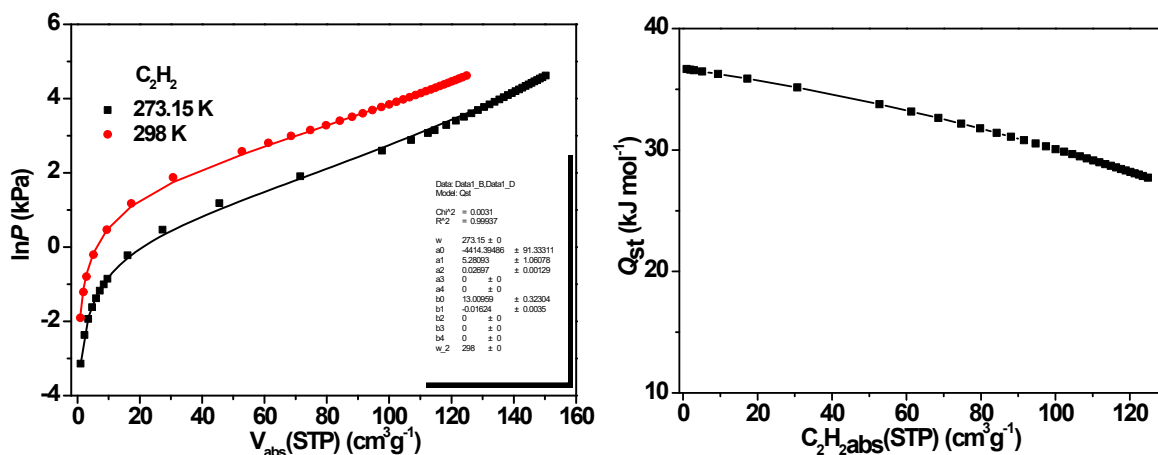

**Fig. S10** Fitted  $\text{C}_2\text{H}_2$  isotherms of **1a** measured at 273.15 and 298 K, and their corresponding isosteric heats of adsorption ( $Q_{\text{st}}$ ).

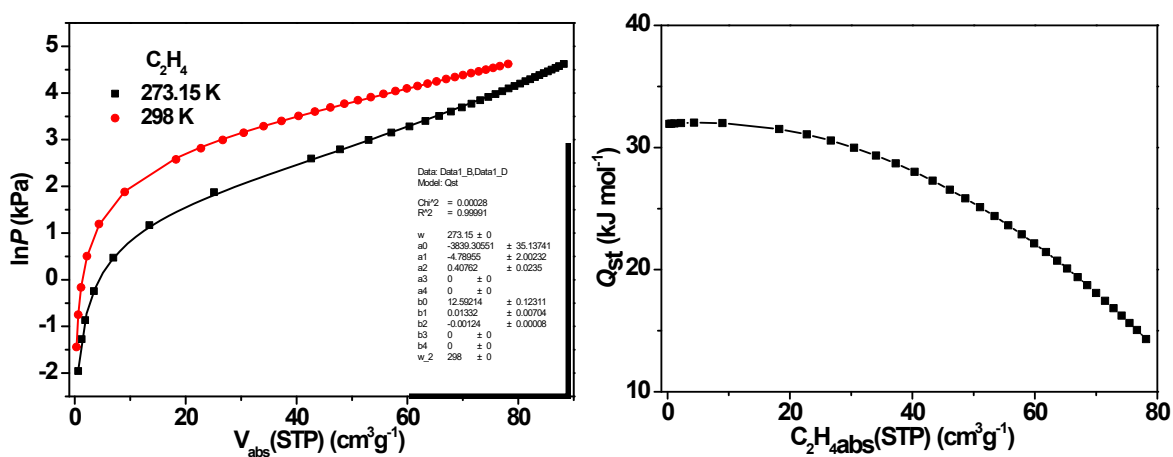

**Fig. S11** Fitted  $\text{C}_2\text{H}_4$  isotherms of **1a** measured at 273.15 and 298 K, and their corresponding isosteric heats of adsorption ( $Q_{\text{st}}$ ).

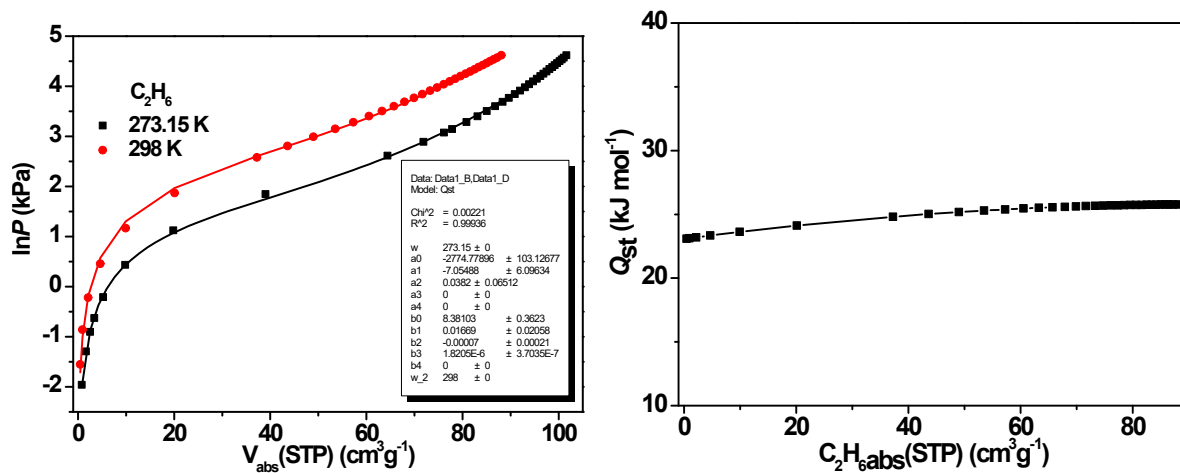

**Fig. S12** Fitted  $\text{C}_2\text{H}_6$  isotherms of **1a** measured at 273.15 and 298 K, and their corresponding isosteric heats of adsorption ( $Q_{\text{st}}$ ).

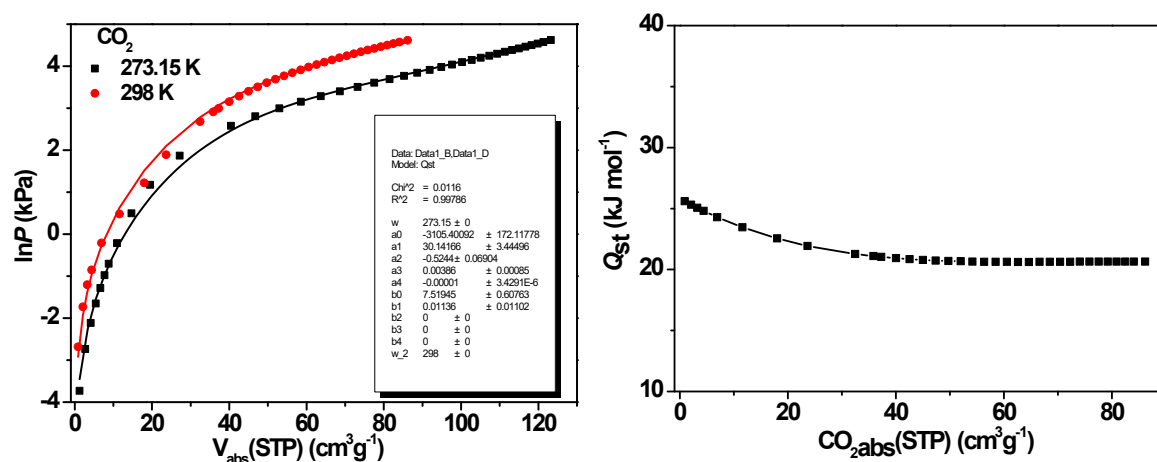

**Fig. S13** Fitted  $\text{CO}_2$  isotherms of **1a** measured at 273.15 and 298 K, and their corresponding isosteric heats of adsorption ( $Q_{\text{st}}$ ).



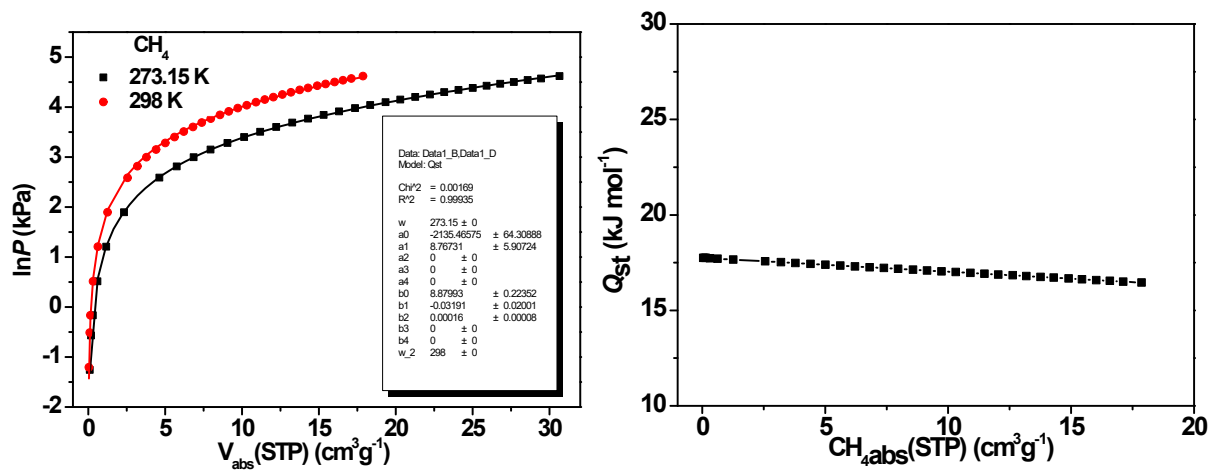

**Fig. S14** Fitted CH<sub>4</sub> isotherms of **1a** measured at 273.15 and 298 K, and their corresponding isosteric heats of adsorption ( $Q_{st}$ ).

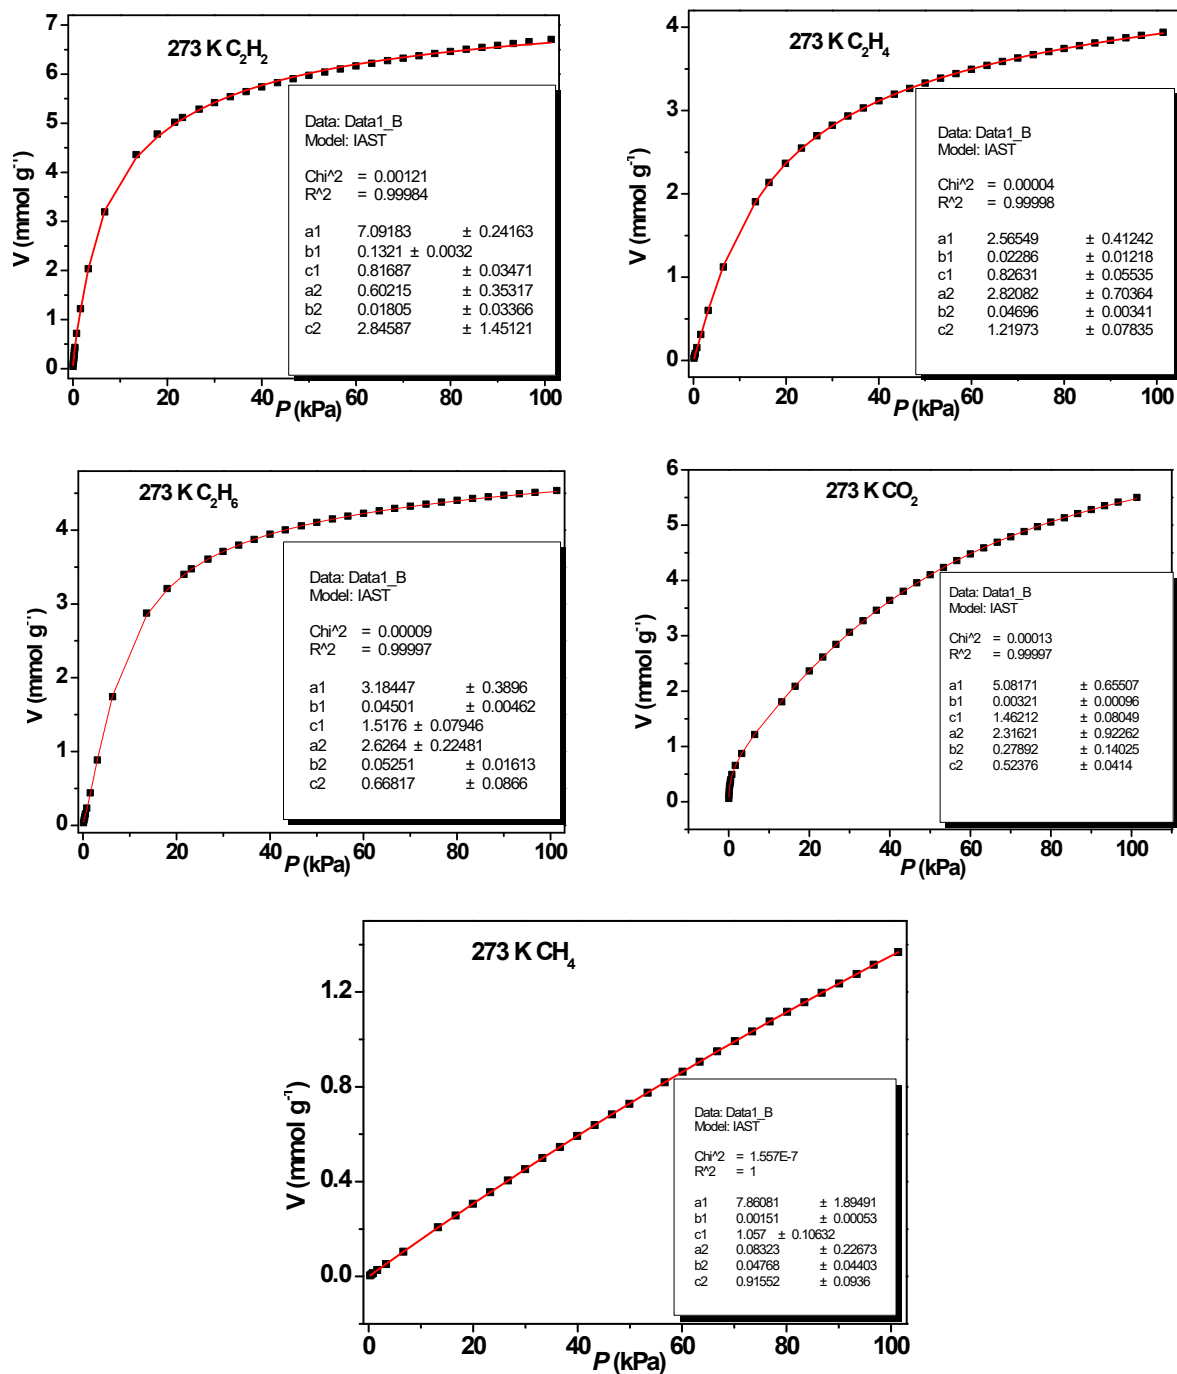

Fig. S15 Adsorption isotherms of **1a** with fitted by dual L-F model at 273 K.

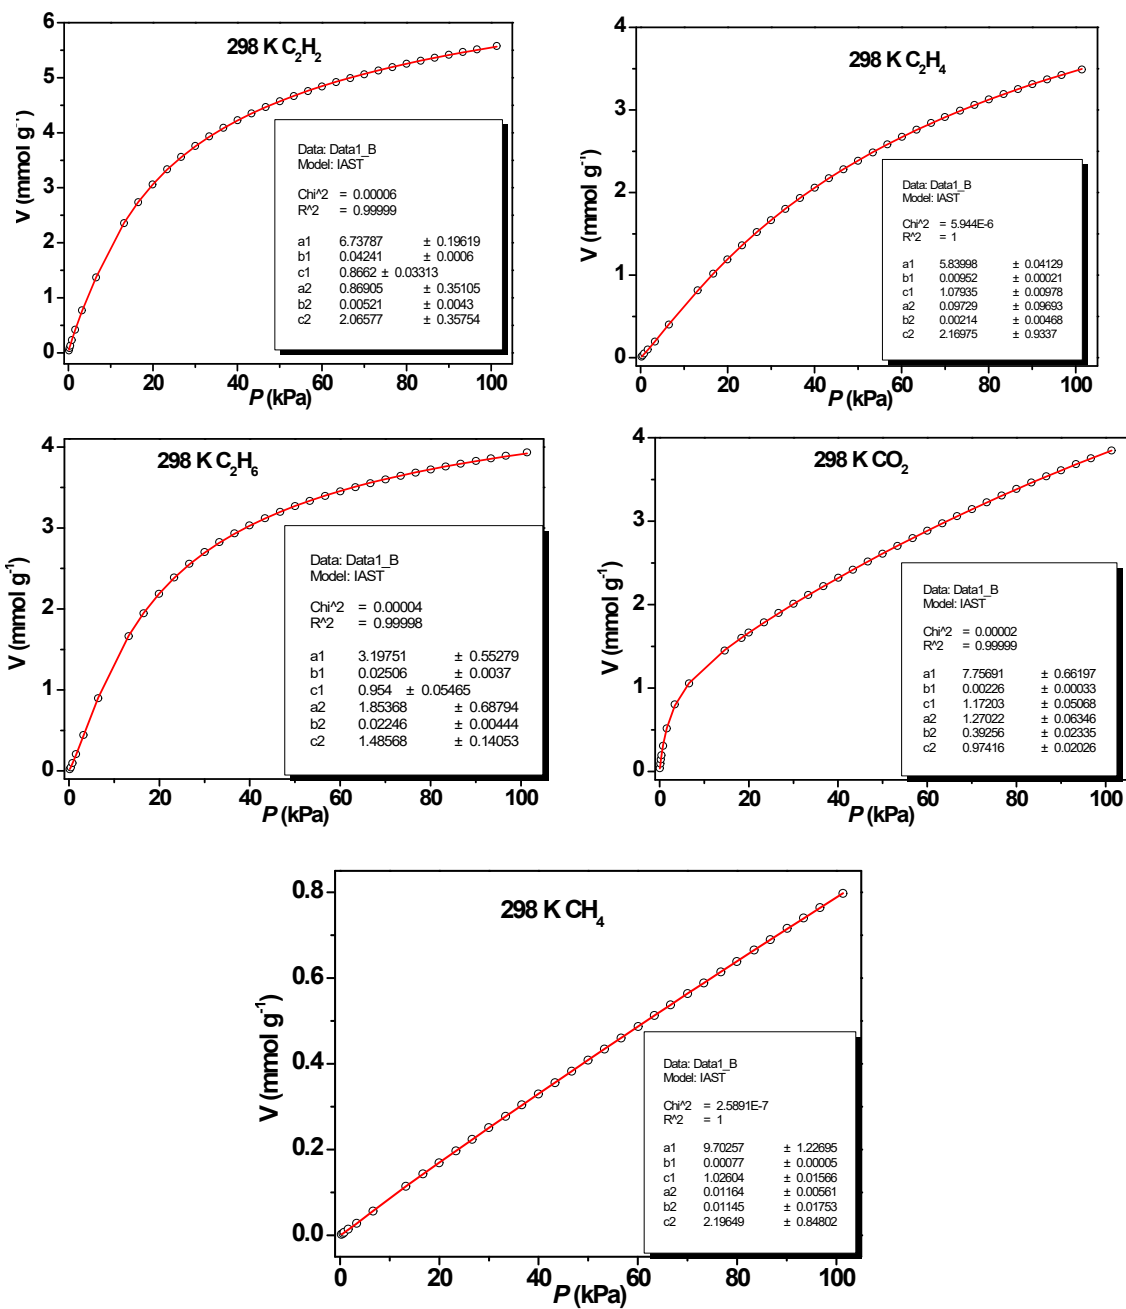

**Fig. S16** Adsorption isotherms of **1a** fitted by dual L-F model at 298 K.

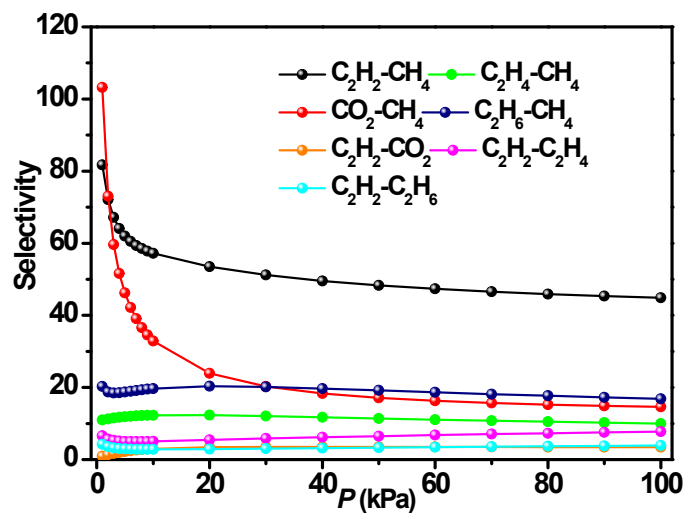

Fig. S17 Adsorption selectivity at 273 K calculated by IAST.

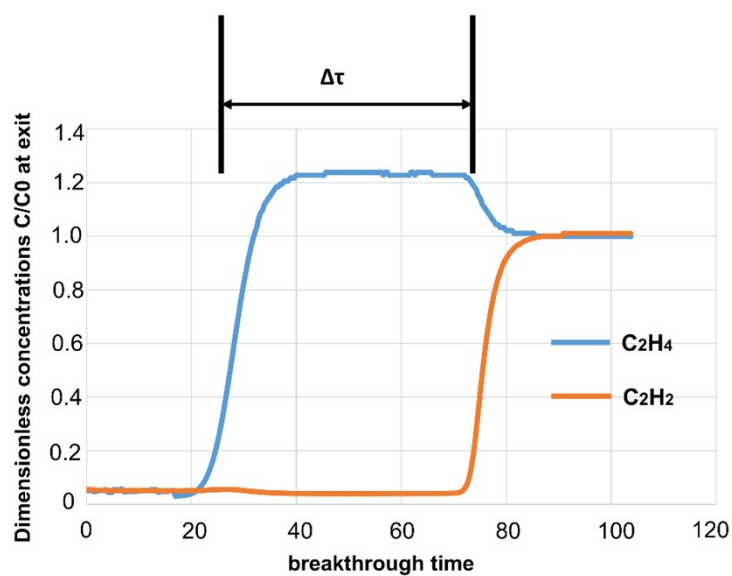

Fig. S18 Breakthrough time intervals ( $\Delta\tau$ ) between  $C_2H_2$  and  $C_2H_4$  ( $C_2H_2:C_2H_4 = 1:1$ ) for **1a**.

**Table S1.** Crystallographic data for **1**.

|                                                                                                    |                                                                    |
|----------------------------------------------------------------------------------------------------|--------------------------------------------------------------------|
| Chemical formula                                                                                   | C <sub>14</sub> H <sub>11</sub> FN <sub>4</sub> NiO <sub>1.5</sub> |
| Formula weight                                                                                     | 336.98                                                             |
| <i>T</i> (K)                                                                                       | 296(2) K                                                           |
| Crystal system                                                                                     | Orthorhombic                                                       |
| Space group                                                                                        | <i>Pmc2<sub>1</sub></i>                                            |
| <i>a</i> (Å)                                                                                       | 11.343(3)                                                          |
| <i>b</i> (Å)                                                                                       | 12.587(3)                                                          |
| <i>c</i> (Å)                                                                                       | 13.755(3)                                                          |
| $\alpha$ (°)                                                                                       | 90                                                                 |
| $\beta$ (°)                                                                                        | 90                                                                 |
| $\gamma$ (°)                                                                                       | 90                                                                 |
| <i>V</i> (Å <sup>3</sup> )                                                                         | 1963.9(8)                                                          |
| <i>Z</i>                                                                                           | 4                                                                  |
| <i>D</i> <sub>calcd.</sub> [g·cm <sup>-3</sup> ]                                                   | 1.140                                                              |
| $\mu$ (mm <sup>-1</sup> )                                                                          | 1.001                                                              |
| Reflns collected/unique/ <i>R</i> <sub>int</sub>                                                   | 10368/3970/0.0771                                                  |
| Goof                                                                                               | 0.997                                                              |
| <i>R</i> <sub>1</sub> <sup>a</sup> , <i>wR</i> <sub>2</sub> <sup>b</sup> [ <i>I</i> > 2 $\sigma$ ] | <i>R</i> <sub>1</sub> = 0.0546, <i>wR</i> <sub>2</sub> = 0.1148    |
| <i>R</i> <sub>1</sub> <sup>a</sup> , <i>wR</i> <sub>2</sub> <sup>b</sup> (all data)                | <i>R</i> <sub>1</sub> = 0.0887, <i>wR</i> <sub>2</sub> = 0.1312    |

$${}^a R_1 = \Sigma(|F_o| - |F_c|) / \Sigma |F_o|. \quad {}^b R_2 = [\Sigma w(F_o^2 - F_c^2)^2 / \Sigma w(F_o^2)^2]^{1/2}.$$

**Table S2.** Selected bond lengths [ $\text{\AA}$ ] and angles [ $^\circ$ ] for **1**.

|                     |           |                     |           |
|---------------------|-----------|---------------------|-----------|
| Ni(1)-F(2)#1        | 2.027(11) | F(1)-Ni(1)-N(5)#3   | 90.9(4)   |
| Ni(1)-F(1)          | 2.035(10) | O(2)#2-Ni(1)-N(5)#3 | 89.4(3)   |
| Ni(1)-O(2)#2        | 2.042(14) | N(5)-Ni(1)-N(5)#3   | 178.0(8)  |
| Ni(1)-N(5)          | 2.109(5)  | F(2)#1-Ni(1)-N(2)   | 86.0(5)   |
| Ni(1)-N(5)#3        | 2.109(5)  | F(1)-Ni(1)-N(2)     | 89.5(5)   |
| Ni(1)-N(2)          | 2.121(15) | O(2)#2-Ni(1)-N(2)   | 174.0(7)  |
| Ni(2)-F(2)          | 1.975(10) | N(5)-Ni(1)-N(2)     | 90.5(3)   |
| Ni(2)-O(1)          | 2.011(9)  | N(5)#3-Ni(1)-N(2)   | 90.5(3)   |
| Ni(2)-F(1)#4        | 2.043(9)  | F(2)-Ni(2)-O(1)     | 171.1(4)  |
| Ni(2)-N(6)#3        | 2.114(5)  | F(2)-Ni(2)-F(1)#4   | 91.18(19) |
| Ni(2)-N(6)          | 2.114(5)  | O(1)-Ni(2)-F(1)#4   | 97.8(4)   |
| Ni(2)-N(3)#5        | 2.146(16) | F(2)-Ni(2)-N(6)#3   | 90.9(4)   |
| F(1)-Ni(2)#2        | 2.043(9)  | O(1)-Ni(2)-N(6)#3   | 89.0(3)   |
| F(2)-Ni(1)#5        | 2.027(11) | F(1)#4-Ni(2)-N(6)#3 | 90.6(3)   |
| O(2)-Ni(1)#4        | 2.042(14) | F(2)-Ni(2)-N(6)     | 90.9(4)   |
| N(3)-Ni(2)#1        | 2.146(16) | O(1)-Ni(2)-N(6)     | 89.0(3)   |
| F(2)#1-Ni(1)-F(1)   | 175.5(5)  | F(1)#4-Ni(2)-N(6)   | 90.6(3)   |
| F(2)#1-Ni(1)-O(2)#2 | 88.1(5)   | N(6)#3-Ni(2)-N(6)   | 177.8(4)  |
| F(1)-Ni(1)-O(2)#2   | 96.4(5)   | F(2)-Ni(2)-N(3)#5   | 81.9(5)   |
| F(2)#1-Ni(1)-N(5)   | 89.2(4)   | O(1)-Ni(2)-N(3)#5   | 89.1(5)   |
| F(1)-Ni(1)-N(5)     | 90.9(4)   | F(1)#4-Ni(2)-N(3)#5 | 173.1(5)  |
| O(2)#2-Ni(1)-N(5)   | 89.4(3)   | N(6)#3-Ni(2)-N(3)#5 | 89.6(4)   |
| F(2)#1-Ni(1)-N(5)#3 | 89.2(4)   | N(6)-Ni(2)-N(3)#5   | 89.6(4)   |

<sup>a</sup>Symmetry transformations used to generate equivalent atoms: #1  $-x+1, -y+1, z-1/2$ ; #2  $x, y+1, z$ ; #3  $-x+1, y, z$ ; #4  $x, y-1, z$ ; #5  $-x+1, -y+1, z-1/2$ .

**Table S3.** A comparison of high-performance C<sub>2</sub>H<sub>2</sub> uptake and  $Q_{st}$  for MOFs at 298 K.

| MOFs                                                                    | $D_1$                 | $G$                                | $V$                                 | $D_2$                 | initial $Q_{st}$        | Ref.      |
|-------------------------------------------------------------------------|-----------------------|------------------------------------|-------------------------------------|-----------------------|-------------------------|-----------|
|                                                                         | (g cm <sup>-3</sup> ) | (cm <sup>3</sup> g <sup>-1</sup> ) | (cm <sup>3</sup> cm <sup>-3</sup> ) | (g cm <sup>-3</sup> ) | (kJ mol <sup>-1</sup> ) |           |
| <b>1a</b>                                                               | 1.140                 | 124.8                              | 142                                 | 0.17                  | 36.7                    | This work |
| FJI-H8                                                                  | 0.876                 | 224                                | 196                                 | 0.23                  | 32                      | 1         |
| [Co <sub>2</sub> (DHTP)]                                                | 1.169                 | 197                                | 230                                 | 0.27                  | 50.1                    | 2         |
| HKUST-1                                                                 | 0.879                 | 201                                | 177                                 | 0.21                  | 30.4                    | 3         |
| SIFSIX-Cu-TPA                                                           | 0.995                 | 185                                | 184                                 | 0.21                  | 39.1                    | 4         |
| FJU-90                                                                  | 0.816                 | 183                                | 149                                 | 0.17                  | 25.2                    | 5         |
| Cu-CPAH                                                                 | 1.317                 | 132                                | 174                                 | 0.20                  | 35.4                    | 6         |
| SNNU-27-Ni                                                              | 0.763                 | 159.0                              | 121                                 | 0.14                  | 23.1                    | 7         |
| SNNU-26-Co                                                              | 0.832                 | 155.6                              | 129                                 | 0.15                  | 26.6                    | 7         |
| ZJNU-69                                                                 | 0.930                 | 171.7                              | 159                                 | 0.18                  | 31.2                    | 8         |
| SNNU-61                                                                 | 1.163                 | 142.1                              | 165                                 | 0.19                  | 38.2                    | 9         |
| SNNU-65-Cu-Ca                                                           | 0.682                 | 141.6                              | 96                                  | 0.11                  | 31.7                    | 10        |
| NCU-100                                                                 | 1.535                 | 102                                | 156                                 | 0.18                  | 60.5                    | 11        |
| PCN-33                                                                  | 1.327                 | 122                                | 162                                 | 0.19                  | 27.3                    | 12        |
| [Co(btzip)(H <sub>2</sub> btzip)]                                       | 1.184                 | 121                                | 143                                 | 0.17                  | 37.3                    | 13        |
| [Co <sub>2</sub> (L) <sub>2</sub> (BDC-Br)(H <sub>2</sub> O)]           | 1.401                 | 121.4                              | 170                                 | 0.19                  | /                       | 14        |
| Tm <sub>2</sub> (OH-bdc) <sub>2</sub> (μ <sub>3</sub> -OH) <sub>2</sub> | 1.191                 | 118                                | 140                                 | 0.16                  | 17.8                    | 15        |
| MOF-505                                                                 | 0.927                 | 148                                | 137                                 | 0.16                  | 24.7                    | 3         |
| NPU-1                                                                   | 0.957                 | 114.2                              | 109                                 | 0.13                  | 27.88                   | 16        |
| NPU-2                                                                   | 0.830                 | 90.2                               | 86                                  | 0.1                   | 20.98                   | 16        |
| NPU-3                                                                   | 0.732                 | 57.7                               | 42                                  | 0.05                  | 19.93                   | 16        |
| ZJNU-34(NH <sub>2</sub> )                                               | 0.7064                | 194                                | 137                                 | 0.16                  | 34.2                    | 17        |
| ZJNU-37(F)                                                              | 0.7013                | 171.5                              | 120.3                               | 0.14                  | 33.6                    | 17        |
| [Cu <sub>0.5</sub> (tztp) <sub>0.5</sub> ]                              | 1.205                 | 112                                | 135                                 | 0.16                  | 38.3                    | 18        |
| MECS-5a                                                                 | 1.369                 | 86                                 | 118                                 | 0.14                  | 26.09                   | 19        |
| ZJU-74a                                                                 | 1.353                 | 86                                 | 115                                 | 0.13                  | 45                      | 20        |

|            |       |       |     |      |      |    |
|------------|-------|-------|-----|------|------|----|
| [Ni(dpip)] | 0.807 | 83.6  | 67  | 0.08 | 41.7 | 21 |
| SNNU-45    | 0.844 | 134   | 113 | 0.13 | 39.9 | 22 |
| FJU-6-TATB | 0.928 | 110   | 102 | 0.12 | 29   | 23 |
| UTSA-74a   | 1.34  | 145.0 | 194 | 0.22 | 31   | 24 |
| Sc-EBTC    | 0.872 | 88    | 77  | 0.09 | 22.6 | 25 |
| NbU-1      | 1.225 | 60    | 74  | 0.09 | 38.3 | 26 |
| SNNU-28-Co | 0.742 | 58.2  | 43  | 0.05 | 31.5 | 7  |
| JLU-MOF66  | 1.348 | 55    | 74  | 0.09 | 35.6 | 27 |
| BSF-1      | 1.046 | 52.6  | 55  | 0.06 | 31   | 28 |
| ZIF-8      | 0.924 | 25    | 23  | 0.03 | 13.3 | 3  |
| MOF-5      | 0.590 | 26    | 15  | 0.02 | 16.1 | 3  |

**Table S4.** Gas adsorption results of **1a**.

| <b>1a</b> | $S_{\text{BET}}$<br>(m <sup>2</sup> /g) | Pore<br>sizes | Adsorption uptake (cm cm <sup>-3</sup> ) |                               |                               |                 |                 | $Q_{\text{st}}$ at Zero<br>Coverage (kJ mol <sup>-1</sup> ) |                               |                               |                 |                 |
|-----------|-----------------------------------------|---------------|------------------------------------------|-------------------------------|-------------------------------|-----------------|-----------------|-------------------------------------------------------------|-------------------------------|-------------------------------|-----------------|-----------------|
|           |                                         |               | C <sub>2</sub> H <sub>2</sub>            | C <sub>2</sub> H <sub>4</sub> | C <sub>2</sub> H <sub>6</sub> | CH <sub>4</sub> | CO <sub>2</sub> | C <sub>2</sub> H <sub>2</sub>                               | C <sub>2</sub> H <sub>4</sub> | C <sub>2</sub> H <sub>6</sub> | CH <sub>4</sub> | CO <sub>2</sub> |
|           | 700                                     | 7 Å           |                                          |                               |                               |                 |                 |                                                             |                               |                               |                 |                 |
| 273 K     |                                         |               | 171                                      | 101                           | 115                           | 35              | 140             |                                                             |                               |                               |                 |                 |
| 298 K     |                                         |               | 142                                      | 89                            | 100                           | 20              | 98              | 36.7                                                        | 31.9                          | 23.1                          | 17.8            | 25.6            |



**Table S5.** Summary of C<sub>2</sub>H<sub>2</sub> and CO<sub>2</sub> uptakes and C<sub>2</sub>H<sub>2</sub>-CO<sub>2</sub> and CO<sub>2</sub>-CH<sub>4</sub> selectivity for different MOFs at 298 K under 100 kPa.

| MOFs                                                                                         | C <sub>2</sub> H <sub>2</sub> /CO <sub>2</sub> Uptakes<br>(mmol g <sup>-1</sup> ) | C <sub>2</sub> H <sub>2</sub> -CO <sub>2</sub><br>selectivity | CO <sub>2</sub> -CH <sub>4</sub><br>selectivity | Ref.             |
|----------------------------------------------------------------------------------------------|-----------------------------------------------------------------------------------|---------------------------------------------------------------|-------------------------------------------------|------------------|
| <b>1a</b>                                                                                    | 5.57/3.84                                                                         | 2.2/3.4 <sup>c</sup>                                          | 15.2/14.6 <sup>c</sup>                          | <b>This work</b> |
| [Cu <sub>0.5</sub> (tztp) <sub>0.5</sub> ]                                                   | 5.0/3.40                                                                          | 2.7                                                           | 6.5                                             | 18               |
| FJU-6-TATB                                                                                   | 4.91 <sup>b</sup> /2.58 <sup>b</sup>                                              | 3.1 <sup>b</sup>                                              | NA                                              | 23               |
| Zn-MOF-74                                                                                    | 5.52 /5.38                                                                        | 2                                                             | NA                                              | 24               |
| BSF-1                                                                                        | 2.35/1.77                                                                         | 3.3                                                           | 7.5                                             | 28               |
| [Cd(dtztp) <sub>0.5</sub> (HCOO)]                                                            | 3.57/2.87                                                                         | 2                                                             | 14.8                                            | 29               |
| PCM-48                                                                                       | 1.14/NA                                                                           | 4.3 <sup>b</sup>                                              | 6.1                                             | 30               |
| MIL-53(Al)                                                                                   | NA/1.3 <sup>a</sup>                                                               | NA                                                            | 7                                               | 31               |
| [Zn <sub>12</sub> (tdc) <sub>6</sub> (EgO <sub>2</sub> ) <sub>6</sub> (dabco) <sub>3</sub> ] | 1.95/1.80                                                                         | 3.3/4.4 <sup>c</sup>                                          | 2.9/3.3 <sup>c</sup>                            | 32               |
| [Zn <sub>12</sub> (tdc) <sub>6</sub> (PrO <sub>2</sub> ) <sub>6</sub> (dabco) <sub>3</sub> ] | 2.33/2.03                                                                         | 1.1/1.1 <sup>c</sup>                                          | 3.8/4.5 <sup>c</sup>                            | 32               |
| [Zn <sub>12</sub> (tdc) <sub>6</sub> (BuO <sub>2</sub> ) <sub>6</sub> (dabco) <sub>3</sub> ] | 2.22/1.76                                                                         | 1.4/2.0 <sup>c</sup>                                          | 3.1/3.9 <sup>c</sup>                            | 32               |
| NTU-56                                                                                       | 1.59 <sup>c</sup> /1.14 <sup>c</sup>                                              | 1/2.3 <sup>c</sup>                                            | NA                                              | 33               |
| SNNU- 5-In                                                                                   | 6.9 <sup>c</sup> /3.24 <sup>c</sup>                                               | 2.6 <sup>c</sup>                                              | 3.9 <sup>c</sup>                                | 34               |
| SNNU-13                                                                                      | 3.17/1.94                                                                         | 3.5/3.1 <sup>c</sup>                                          | 7.6/21.6 <sup>c</sup>                           | 35               |
| NbU-10                                                                                       | 3.51 <sup>c</sup> /2.63 <sup>c</sup>                                              | 6.5/6.6 <sup>c</sup>                                          | NA                                              | 36               |

\*a: measured at 303 K; b: measured at 296 K; c: measured at 273 K; NA = not available

**Table S6.** Summary of C<sub>2</sub>H<sub>n</sub>/CH<sub>4</sub> selectivity for different MOFs at 273 and 298 K under 100 kPa.

| MOFs                                                                                         | Temperatur<br>e<br>(K) | IAST selectivity                               |                                                |                                                | Ref.      |
|----------------------------------------------------------------------------------------------|------------------------|------------------------------------------------|------------------------------------------------|------------------------------------------------|-----------|
|                                                                                              |                        | C <sub>2</sub> H <sub>2</sub> -CH <sub>4</sub> | C <sub>2</sub> H <sub>4</sub> -CH <sub>4</sub> | C <sub>2</sub> H <sub>6</sub> -CH <sub>4</sub> |           |
| <b>1a</b>                                                                                    | 273                    | 44.8                                           | 10.0                                           | 16.9                                           | This work |
|                                                                                              | 298                    | 25.9                                           | 7.5                                            | 15.1                                           |           |
| SNNU-5-In                                                                                    | 273                    | 10.0                                           | 7.4                                            | NA                                             | 34        |
| SNNU-13                                                                                      | 273                    | 114.9                                          | 40.2                                           | NA                                             | 35        |
|                                                                                              | 298                    | 48.5                                           | 20                                             | NA                                             |           |
| HCP-B                                                                                        | 273                    | 14.1                                           | 10.6                                           | 14.1                                           | 37        |
|                                                                                              | 298                    | 9.6                                            | 6.0                                            | 8.1                                            |           |
| NOTT-101                                                                                     | 273                    | 36.9                                           | 30.0                                           | 11.1                                           | 38        |
|                                                                                              | 298                    | 22.2                                           | 18.6                                           | 14.1                                           |           |
| Cu <sub>0.5</sub> (tztp) <sub>0.5</sub>                                                      | 298                    | 23.0                                           | 11.3                                           | 16.1                                           | 18        |
| ZnSDB                                                                                        | 273                    | 18.6                                           | 17.6                                           | 20.6                                           | 39        |
|                                                                                              | 298                    | 16.9                                           | 15.9                                           | 23.2                                           |           |
| Sc-ABTC                                                                                      | 273                    | 28.4                                           | 19.9                                           | NA                                             | 25        |
|                                                                                              | 298                    | 14.7                                           | 11.7                                           | NA                                             |           |
| ZJNU-63                                                                                      | 298                    | 13.1                                           | 7                                              | 10.6                                           | 40        |
| LIFM-WZ-3                                                                                    | 273                    | NA                                             | 17.3                                           | 9.8                                            | 41        |
|                                                                                              | 298                    | NA                                             | 26.8                                           | 10.7                                           |           |
| SNNU-64                                                                                      | 273                    | 45.7                                           | 42.7                                           | NA                                             | 42        |
|                                                                                              | 298                    | 35.8                                           | 24.3                                           | NA                                             |           |
| [Zn <sub>12</sub> (tdc) <sub>6</sub> (PrO <sub>2</sub> ) <sub>6</sub> (dabco) <sub>3</sub> ] | 273                    | 3.6                                            | 3.9                                            | 5.6                                            | 32        |
|                                                                                              | 298                    | 3.0                                            | 5.5                                            | 4.7                                            |           |

NA = not available.

**Table S7.** Summary of C<sub>2</sub>H<sub>2</sub>-C<sub>2</sub>H<sub>4</sub> and C<sub>2</sub>H<sub>2</sub>-C<sub>2</sub>H<sub>6</sub> selectivity for different materials at 273 and 298 K under 100 kPa.

| Materials                                         | Gas selectivity                                              | IAST selectivity |                  | Ref.             |
|---------------------------------------------------|--------------------------------------------------------------|------------------|------------------|------------------|
|                                                   |                                                              | 273 K            | 298 K            |                  |
| <b>1a</b>                                         | C <sub>2</sub> H <sub>2</sub> -C <sub>2</sub> H <sub>4</sub> | 7.7              | 4.0              | <b>This work</b> |
|                                                   | C <sub>2</sub> H <sub>2</sub> -C <sub>2</sub> H <sub>6</sub> | 3.9              | 2.1              |                  |
| Na-ZM                                             | C <sub>2</sub> H <sub>2</sub> -C <sub>2</sub> H <sub>6</sub> | 4.2              | NA               | 43               |
|                                                   | C <sub>2</sub> H <sub>2</sub> -C <sub>2</sub> H <sub>4</sub> | 1                | NA               |                  |
| YAU-7                                             | C <sub>2</sub> H <sub>2</sub> -C <sub>2</sub> H <sub>4</sub> | 1.30             | 1.5              | 44               |
| MgMOF-74                                          | C <sub>2</sub> H <sub>2</sub> -C <sub>2</sub> H <sub>4</sub> | NA               | 2.18             | 19               |
| CoMOF-74                                          | C <sub>2</sub> H <sub>2</sub> -C <sub>2</sub> H <sub>4</sub> | NA               | 1.70             |                  |
| NOTT-300                                          | C <sub>2</sub> H <sub>2</sub> -C <sub>2</sub> H <sub>4</sub> | NA               | 2.17             |                  |
| UTSA-60a                                          | C <sub>2</sub> H <sub>2</sub> -C <sub>2</sub> H <sub>4</sub> | NA               | ~5.5             |                  |
| UTSA-67a                                          | C <sub>2</sub> H <sub>2</sub> -C <sub>2</sub> H <sub>4</sub> | NA               | 5                | 45               |
| NbU-1                                             | C <sub>2</sub> H <sub>2</sub> -C <sub>2</sub> H <sub>4</sub> | 12.1             | 5.9              | 26               |
| Zn <sub>2</sub> (Atz) <sub>2</sub> O <sub>x</sub> | C <sub>2</sub> H <sub>2</sub> -C <sub>2</sub> H <sub>4</sub> | NA               | 1.74             | 46               |
| HUST-5                                            | C <sub>2</sub> H <sub>2</sub> -C <sub>2</sub> H <sub>4</sub> | 1.8              | NA               | 47               |
| SNNU-95                                           | C <sub>2</sub> H <sub>2</sub> -C <sub>2</sub> H <sub>4</sub> | NA               | 1.7              | 48               |
| BSF-1                                             | C <sub>2</sub> H <sub>2</sub> -C <sub>2</sub> H <sub>4</sub> | NA               | 2.3              | 28               |
| PAF-110                                           | C <sub>2</sub> H <sub>2</sub> -C <sub>2</sub> H <sub>4</sub> | NA               | 3.9              | 49               |
| CTF-PO71                                          | C <sub>2</sub> H <sub>2</sub> -C <sub>2</sub> H <sub>4</sub> | NA               | 1.8              | 50               |
| M'MOF-3a                                          | C <sub>2</sub> H <sub>2</sub> -C <sub>2</sub> H <sub>4</sub> | NA               | 1.6 <sup>a</sup> | 51               |
| Fe <sub>2</sub> (dobdc)                           | C <sub>2</sub> H <sub>2</sub> -C <sub>2</sub> H <sub>4</sub> | NA               | 1.87             | 52               |

\*a: measured at 296 K; NA = not available

**Table S8.** Comparison of stability for some top-performing C<sub>2</sub>H<sub>2</sub> separation MOFs.

| MOFs                                                                                                    | Water | pH = 2 | pH = 12 | Thermal stability | Ref.      |
|---------------------------------------------------------------------------------------------------------|-------|--------|---------|-------------------|-----------|
| <b>1a</b>                                                                                               | ✓     | ✓      | ✓       | 290 °C            | This work |
| UiO-66                                                                                                  | ✓     | ✓      | ✓       | 500 °C            | 53        |
| ZIF-8                                                                                                   | ✓     | ✓      | ✓       | 450°C             | 54        |
| bio-MOF-1                                                                                               | ✓     | a      | a       | 180 °C            | 55        |
| FeNi-M'MOF                                                                                              | ✓     | a      | a       | 200 °C            | 56        |
| JCM-1                                                                                                   | ✓     | ✗      | ✗       | 300 °C            | 57        |
| UTSA-300                                                                                                | ✗     | ✗      | ✗       | 200 °C            | 58        |
| ATC-Cu                                                                                                  | ✓     | a      | a       | 270 °C            | 59        |
| HOF-3                                                                                                   | ✗     | ✗      | ✗       | 350 °C            | 60        |
| NKMOF-1-Ni                                                                                              | ✓     | ✓      | ✓       | 240 °C            | 61        |
| MUF-16                                                                                                  | ✓     | a      | a       | 330 °C            | 62        |
| Tm <sub>2</sub> (OH-bdc) <sub>2</sub> (μ <sub>3</sub> -OH) <sub>2</sub> (H <sub>2</sub> O) <sub>2</sub> | ✓     | a      | a       | 400 °C            | 15        |
| PCP-NH <sub>2</sub> -ipa                                                                                | ✓     | a      | a       | 280 °C            | 63        |
| Azole-Th-1                                                                                              | ✓     | ✓      | ✓       | 200 °C            | 64        |
| UPC-612                                                                                                 | ✓     | ✓      | ✓       | 300 °C            | 65        |
| Ca(squarate)                                                                                            | ✓     | a      | a       | 400 °C            | 66        |
| UTSA-74                                                                                                 | ✗     | ✗      | ✗       | 200 °C            | 24        |
| SNNU-27-Fe                                                                                              | ✓     | ✓      | ✓       | 320 °C            | 7         |
| ZJU-74                                                                                                  | ✓     | ✓      | ✓       | 300 °C            | 20        |
| JNU-1                                                                                                   | ✓     | ✗      | ✓       | 450 °C            | 67        |

<sup>a</sup> The stability in the corresponding conditions was not reported in the literatures.

### Molecular Simulation

Grand canonical Monte Carlo (GCMC) simulations were performed for the gas adsorption in the framework by the Sorption module of Material Studio (Accelrys. Materials Studio Getting Started, release 5.0). The framework was considered to be rigid, and the optimized gas and epoxide molecules were used. The atom charges and bond lengths for the gas molecules are as follows:

CO<sub>2</sub>, C = 0.576000e, O = -0.288000e, C-O = 1.168 Å.

C<sub>2</sub>H<sub>2</sub>, C = -0.238847 e, H = 0.238847 e, C-C = 1.198 Å, C-H = 1.065 Å.

C<sub>2</sub>H<sub>4</sub>, C = -0.295071 e, H = 0.147536 e, C-C = 1.334 Å, C-H = 1.090 Å.

C<sub>2</sub>H<sub>6</sub>, C = -0.458757 e, H = 0.152919 e, C-C = 1.528 Å, C-H = 1.099 Å.

The partial atom charges of the framework were derived from QEq method and QEq neutral 1.0 parameter (Table S9). One unit cell was used during the simulations. The interaction energies between the gas molecules and framework were computed through the Coulomb and Lennard-Jones 6-12 (LJ) potentials. All parameters for the atoms were modeled with the universal force field (UFF) embedded in the MS modeling package. A cutoff distance of 12.5 Å was used for LJ interactions, and the Coulombic interactions were calculated by using Ewald summation. For each run, the  $5 \times 10^6$  maximum loading steps,  $5 \times 10^6$  production steps were employed.

**Table S9.** The atomic partial charges (e) in the framework.

|     |            |    |           |     |           |     |            |     |           |
|-----|------------|----|-----------|-----|-----------|-----|------------|-----|-----------|
| Ni1 | 1.13529    | N6 | -0.251918 | C7  | -0.155383 | C16 | 0.0346167  | H12 | 0.0930945 |
| Ni2 | 1.13395    | O1 | -0.550478 | C8  | 0.518427  | C17 | -0.158774  | H13 | 0.133209  |
| F1  | -0.564701  | O2 | -0.534282 | C9  | 0.0158995 | C18 | 0.00154532 | H14 | 0.135115  |
| F2  | -0.565625  | C1 | 0.274925  | C10 | -0.155723 | H3  | 0.132791   | H15 | 0.0912609 |
| N1  | -0.281485  | C2 | 0.0326761 | C11 | 0.0351438 | H4  | 0.146805   | H17 | 0.0976686 |
| N2  | -0.0888034 | C3 | -0.153385 | C12 | -0.153645 | H6  | 0.142385   | H18 | 0.133851  |
| N3  | -0.0752667 | C4 | -0.162513 | C13 | 0.0259178 | H7  | 0.129243   |     |           |
| N4  | -0.301747  | C5 | 0.0139411 | C14 | 0.0534890 | H9  | 0.134649   |     |           |
| N5  | -0.255173  | C6 | -0.158681 | C15 | -0.139020 | H10 | 0.0947561  |     |           |

## References:

- 1) J. Pang, F. Jiang, M. Wu, C. Liu, K. Su, W. Lu, D. Yuan and M. Hong, *Nat. Commun.*, 2015, **6**, 7575.
- 2) S.-C. Xiang, W. Zhou, Z.-J. Zhang, M. A. Green, Y. Liu and B. Chen, *Angew. Chem., Int. Ed.*, 2010, **49**, 4615.
- 3) S. Xiang, W. Zhou, J. M. Gallegos, Y. Liu and B. Chen, *J. Am. Chem. Soc.*, 2009, **131**, 12415.
- 4) H. Li, C. Liu, C. Chen, Z. Di, D. Yuan, J. Pang, W. Wei, M. Wu and M. Hong, *Angew. Chem. Int. Ed.*, 2021, **60**, 7547-7552.

- 5) Y. Ye, Z. Ma, R.-B. Lin, R. Krishna, W. Zhou, Q. Lin, Z. Zhang, S. Xiang and B. Chen, *J. Am. Chem. Soc.*, 2019, **141**, 4130-4136.
- 6) L. Meng, L. Yang, C. Chen, X. Dong, S. Ren, G. Li, Y. Li, Y. Han, Z. Shi and S. Feng, *ACS Appl. Mater. Interfaces*, 2020, **12**, 5999-6006.
- 7) Y.-Y. Xue, X.-Y. Bai, J. Zhang, Y. Wang, S.-N. Li, Y.-C. Jiang, M.-C. Hu and Q.-G. Zhai, *Angew. Chem. Int. Ed.*, 2021, **60**, 10122-10128.
- 8) F. Chen, Y. Wang, D. Bai, M. He, X. Gao and Y. He, *J. Mater. Chem. A*, 2018, **6**, 3471-3478.
- 9) J.-W. Zhang, M.-C. Hu, S.-N. Li, Y.-C. Jiang and Q.-G. Zhai, *Chem. Eur. J.*, 2017, **23**, 6693-6700.
- 10) J.-W. Zhang, M.-C. Hu, S.-N. Li, Y.-C. Jiang, P. Qu and Q.-G. Zhai, *Chem. Commun.*, 2018, **54**, 2012-2015.
- 11) J. Wang, Y. Zhang, P. Zhang, J. Hu, R.-B. Lin, Q. Deng, Z. Zeng, H. Xing, S. Deng and B. Chen, *J. Am. Chem. Soc.*, 2020, **142**, 9744-9751.
- 12) J. Duan, W. Jin and R. Krishna, *Inorg. Chem.*, 2015, **54**, 4279-4284.
- 13) Y.-Z. Li, G.-D. Wang, W.-J. Shi, L. Hou, Y.-Y. Wang and Z. Zhu, *ACS Appl. Mater. Interfaces*, 2020, **12**, 41785-41793.
- 14) P.-P. Cui, X.-D. Zhang, Y.-S. Kang, Y. Zhao and W.-Y. Sun, *Inorg. Chem.*, 2021, **60**, 2563-2572.
- 15) D. Ma, Z. Li, J. Zhu, Y. Zhou, L. Chen, X. Mai, M. Liufu, Y. Wu and Y. Li, *J. Mater. Chem. A*, 2020, **8**, 11933-11937.
- 16) B. Zhu, J.-W. Cao, S. Mukherjee, T. Pham, T. Zhang, T. Wang, X. Jiang, K. A. Forrest, M. J. Zaworotko and K.-J. Chen, *J. Am. Chem. Soc.*, 2021, **143**, 1485-1492.
- 17) F. Chen, D. Bai, X. Wang and Y. He, *Inorg. Chem. Front.*, 2017, **4**, 960-967.
- 18) X.-Y. Li, Y.-Z. Li, L.-N. Ma, L. Hou, C.-Z. He, Y.-Y. Wang and Z. Zhu, *J. Mater. Chem. A*, 2020, **8**, 5227.
- 19) X.-J. Hong, Q. Wei, Y.-P. Cai, B. Wu, H.-X. Feng, Y. Yu and R.-F. Dong, *ACS Appl. Mater. Interfaces*, 2017, **9**, 29374-29379.
- 20) J. Pei, K. Shao, J.-X. Wang, H.-M. Wen, Y. Yang, Y. Cui, R. Krishna, B. Li and G. Qian,

- Adv. Mater.*, 2020, **1**, 1908275.
- 21) Y.-Z. Li, G.-D. Wang, L.-N. Ma, L. Hou, Y.-Y. Wang and Z. Zhu, *ACS Appl. Mater. Interfaces*, 2021, **13**, 4102-4109.
- 22) Y.-P. Li, Y. Wang, Y.-Y. Xue, H.-P. Li, Q.-G. Zhai, S.-N. Li, Y.-C. Jiang, M.-C. Hu and X. Bu, *Angew. Chem. Int. Ed.*, 2019, **58**, 13590-13595.
- 23) L. Liu, Z. Yao, Y. Ye, Y. Yang, Q. Lin, Z. Zhang, M. O’Keeffe and S. Xiang, *J. Am. Chem. Soc.*, 2020, **142**, 9258-9266.
- 24) F. Luo, C. Yan, L. Dang, R. Krishna, W. Zhou, H. Wu, X. Dong, Y. Han and T.-L. Hu, *J. Am. Chem. Soc.*, 2016, **138**, 5678-5684.
- 25) J.-W. Zhang, P. Qu, M.-C. Hu, S.-N. Li, Y.-C. Jiang and Q.-G. Zhai, *Inorg. Chem.*, 2019, **58**, 16792-16799.
- 26) J. Li, L. Jiang, S. Chen, A. Kirchon, B. Li, Y. Li and H.-C. Zhou, *J. Am. Chem. Soc.*, 2019, **141**, 3807-3811.
- 27) L. Kan, G. Li and Y. Liu, *ACS Appl. Mater. Interfaces*, 2020, **12**, 18642-18649.
- 28) Y. Zhang, L. Yang, L. Wang, S. Duttwyler and H. Xing, *Angew. Chem., Int. Ed.*, 2019, **58**, 8145-8150.
- 29) G.-D. Wang, Y.-Z. Li, W.-J. Shi, L. Hou, Z. Zhu and Y.-Y. Wang, *Inorg. Chem. Front.*, 2020, **7**, 1957-1964.
- 30) J. E. Reynolds, III, K. M. Walsh, B. Li, P. Kunal, B. Chen and S. M. Humphrey, *Chem. Commun.*, 2018, **54**, 9937-9940.
- 31) V. Finsy, L. Ma, L. Alaerts, D. E. D. Vos, G. V. Baron and J. F. M. Denayer, *Microporous Mesoporous Mater.*, 2009, **120**, 221.
- 32) A. A. Lysova, D. G. Samsonenko, P. V. Dorovatovskii, V. A. Lazarenko, V. N. Khrustalev, K. A. Kovalenko, D. N. Dybtsev and V. P. Fedin, *J. Am. Chem. Soc.*, 2019, **141**, 17260-17269.
- 33) H. Wang, N. Behera, S. Wang, Q. Dong, Z. Wang, B. Zheng, D. Wang and J. Duan, *Inorg. Chem. Front.*, 2020, **7**, 3195-3203.
- 34) J.-W. Zhang, W.-J. Ji, M.-C. Hu, S.-N. Li, Y.-C. Jiang, X.-M. Zhang, P. Qu and Q.-G. Zhai, *Inorg. Chem. Front.*, 2019, **6**, 813-819.
- 35) H.-P. Li, Z.-D. Dou, Y. Wang, Y. Y. Xue, Y. P. Li, M.-C. Hu, S.-N. Li, Y.-C. Jiang and

- Q.-G. Zhai, *Inorg. Chem.*, 2020, **59**, 16725-16736.
- 36) J. Zhao, Q. Li, X. Zhu, J. Li and D. Wu, *Inorg. Chem.*, 2020, **59**, 14424-14431.
- 37) J. Chen, L. Jiang, C. Li, W. Fu, Q. Xia, Y. Wang and Y. Huang, *Polym. Eng. Sci.*, 2021, **61**, 662-668.
- 38) J. Li, S. Chen, L. Jiang, D. Wu and Y. Li, *Inorg. Chem.*, 2019, **58**, 5410-5413.
- 39) F.-S. Tang, R.-B. Lin, R.-G. Lin, J. C.-G. Zhao and B. Chen, *J. Solid State Chem.*, 2018, **258**, 346-350.
- 40) D. Bai, Y. Wang, M. He, X. Gao and Y. He, *Inorg. Chem. Front.*, 2018, **5**, 2227-2237.
- 41) Z. Wang, J.-H. Zhang, J.-J. Jiang, H.-P. Wang, Z.-W. Wei, X. Zhu, M. Pan and C.-Y. Su, *J. Mater. Chem. A*, 2018, **6**, 17698-17705.
- 42) J.-W. Zhang, P. Qu, M.-C. Hu, S.-N. Li, Y.-C. Jiang and Q.-G. Zhai, *Cryst. Growth Des.*, 2020, **20**, 5657-5663
- 43) J. Wang, Q. Zhu, Z. Zhang, M. Sadakane, Y. Li and W. Ueda, *Angew. Chem. Int. Ed.*, 2021, **60**, 18328-18334.
- 44) S.-Y. Li, F.-F. Zhang, X. Wang, M.-H. He, Z. Ding, M. Chen, X.-Y. Hou, X.-L. Chen, L. Tang, E.-L. Yue, J.-J. Wang and F. Fu, *J. Solid State Chem.*, 2021, **294**, 121896.
- 45) H.-M. Wen, B. Li, H. Wang, R. Krishnab and B. Chen, *Chem. Commun.*, 2016, **52**, 1166-1169
- 46) P.-D. Zhang, X.-Q. Wu, T. He, L.-H. Xie, Q. Chen and J.-R. Li, *Chem. Commun.*, 2020, **56**, 5520-5523.
- 47) F. Yu, B.-Q. Hu, X.-N. Wang, Y.-M. Zhao, J.-L. Li, B. Li and H. -C. Zhou, *J. Mater. Chem. A*, 2020, **8**, 2083-2089.
- 48) H. Li, S. Li, X. Hou, Y. Jiang, M. Hua and Q.-G. Zhai, *Dalton Trans.*, 2018, **47**, 9310-9316.
- 49) L. Jiang, Y. Tian, T. Sun, Y. Zhu, H. Ren, X. Zou, Y. Ma, K. R. Meihaus, J. R. Long and G. Zhu, *J. Am. Chem. Soc.*, 2018, **140**, 15724-15730.
- 50) Y. Lu, J. He, Y. Chen, H. Wang, Y. Zhao, Y. Han and Y. Ding, *Macromol. Rapid Commun.*, 2018, **39**, 1700468.
- 51) S.-C. Xiang, Z. Zhang, C.-G. Zhao, K. Hong, X. Zhao, D.-R. Ding, M.-H. Xie, C.-D. Wu, M. C. Das, R. Gill, K. M. Thomas and B. Chen, *Nat. Commun.*, 2011, **2**, 204



- 52) E. D. Bloch, W. L. Queen, R. Krishna, J. M. Zadrozny, C. M. Brown and J. R. Long, *Science*, 2012, **335**, 1606-1610.
- 53) M. J. Katz, Z. J. Brown, Y. J. Colón, P. W. Siu, K. A. Scheidt, R. Q. Snurr, J. T. Hupp and O. K. Farha, *Chem. Commun.*, 2013, **49**, 9449-9451.
- 54) Y. Pan, Y. Liu, G. Zeng, L. Zhao and Z. Lai, *Chem. Commun.*, 2011, **47**, 2071-2073.
- 55) J. An, S. J. Geib and N. L. Rosi, *J. Am. Chem. Soc.*, 2009, **131**, 8376-8377.
- 56) J. Gao, X. Qian, R.-B. Lin, R. Krishna, H. Wu, W. Zhou and B. Chen, *Angew. Chem. Int. Ed.*, 2020, **59**, 4396-4400.
- 57) J. Lee, C. Y. Chuah, J. Kim, Y. Kim, N. Ko, Y. Seo, K. Kim, T. H. Bae and E. Lee, *Angew. Chem., Int. Ed.*, 2018, **57**, 7869-7873.
- 58) R.-B. Lin, L. Li, H. Wu, H. Arman, B. Li, R.-G. Lin, W. Zhou and B. Chen, *J. Am. Chem. Soc.*, 2017, **139**, 8022-8028.
- 59) Z. Niu, X. Cui, T. Pham, G. Verma, P. C. Lan, C. Shan, H. Xing, K. A. Forrest, S. Suepaul, B. Space, A. Nafady, A. M. Al-Enizi and S. Ma, *Angew. Chem. Int. Ed.*, 2021, **60**, 5283-5288.
- 60) P. Li, Y. He, Y. Zhao, L. Weng, H. Wang, R. Krishna, H. Wu, W. Zhou, M. O'Keeffe, Y. Han and B. Chen, *Angew. Chem. Int. Ed.*, **2015**, *54*, 574-577.
- 61) Y.-L. Peng, T. Pham, P. Li, T. Wang, Y. Chen, K.-J. Chen, K. A. Forrest, B. Space, P. Cheng, M. J. Zaworotko and Z. Zhang, *Angew. Chem. Int. Ed.*, 2018, **57**, 10971-10975.
- 62) O. T. Qazvini, R. Babarao and S. G. Telfer, *Nat. Commun.*, 2021, **12**, 197.
- 63) Y. Gu, J.-J. Zheng, K. Otake, M. Shivanna, S. Sakaki, H. Yoshino, M. Ohba, S. Kawaguchi, Y. Wang, F. Li and S. Kitagawa, *Angew. Chem. Int. Ed.*, 2021, **60**, 11688-11694.
- 64) Z. Xu, X. Xiong, J. Xiong, R. Krishna, L. Li, Y. Fan, F. Luo and B. Chen, *Nat. Commun.*, 2020, **11**, 3163.
- 65) Y. Wang, C. Hao, W. Fan, M. Fu, X. Wang, Z. Wang, L. Zhu, Y. Li, X. Lu, F. Dai, Z. Kang, R. Wang, W. Guo, S. Hu and D. Sun, *Angew. Chem. Int. Ed.*, 2021, **60**, 11350-11358.
- 66) L. Li, L. Guo, S. Pu, J. Wang, Q. Yang, Z. Zhang, Y. Yang, Q. Ren, S. Alnemrat and Z.

- Bao, *Chem. Eng. J.*, 2019, **358**, 446-455.
- 67) H. Zeng, M. Xie, Y.-L. Huang, Y. Zhao, X.-J. Xie, J.-P. Bai, M.-Y. Wan, R. Krishna, W. Lu and D. Li, *Angew. Chem., Int. Ed.*, 2019, **58**, 8515-8519.
